# Supplementary material
Source: PubMed Central journal article supplement (PMC4223474)
Supplement: supp_M114.040824_mcp.M114.040824-11.pdf [file supp_M114.040824_mcp.M114.040824-11.pdf]

**Table S1. Plasmids and Strains**

| <b>Plasmid</b>             | <b>Fluorescent Protein<sup>1</sup></b> | <b>Selective Marker<sup>2</sup></b> | <b>Genbank Accession</b> | <b>Strain<sup>3</sup></b> |
|----------------------------|----------------------------------------|-------------------------------------|--------------------------|---------------------------|
| <b>pBS41</b>               | CFP                                    | URA3                                | KF177452                 | EMY200                    |
| <b>pBS43</b>               | YFP                                    | URA3                                | KF177455                 | EMY201                    |
| <b>pBS49</b>               | YFP                                    | LEU2                                | KF177459                 | EMY202                    |
| <b>pBS42BN<sup>4</sup></b> | YFP-Pro0-CFP                           | URA3                                | KF177454                 | EMY203                    |
| <b>pBS46</b>               | YFP-Pro5-CFP                           | URA3                                | KF177456                 | EMY204                    |
| <b>pBS47</b>               | YFP-Pro10-CFP                          | URA3                                | KF177457                 | EMY205                    |
| <b>pBS48</b>               | YFP-Pro15-CFP                          | URA3                                | KF177458                 | EMY206                    |
| <b>pBS50</b>               | YFP-Pro20-CFP                          | URA3                                | KF177460                 | EMY207                    |
| <b>pFTR74-YFP</b>          | FTR74-YFP                              | LEU2                                | KF177461                 | EMY208                    |
| <b>pFTR117-CFP</b>         | FTR117-CFP                             | URA3                                | KF177462                 | EMY208                    |
| <b>pYFP-TAF28-CFP</b>      | YFP-TAF28-CFP                          | URA3                                | KF177465                 | EMY209                    |
| <b>pTAF18<sup>5</sup></b>  |                                        | LEU2                                | KF177463                 | EMY209                    |
| <b>pYFP-Lim4-CFP</b>       | YFP-Lim4-CFP                           | URA3                                | KF177464                 | EMY210                    |
| <b>pYFP-THP112-CFP</b>     | YFP-THP112-                            | URA3                                | KF177466                 | EMY211                    |

<sup>1</sup> Expression of all proteins is driven by the TEF promoter. All proteins have an N-terminal nuclear localization signal.

<sup>2</sup> Plasmids were integrated into strain BSY9 (MATa/MAT $\alpha$  ade2-1oc/ade2-1oc ADE3/ade3?100 can1-100/can1-100 CYH2s/cyh2r his3-11,15/his3-11,15 leu2-3,112/leu2-3,112 trp1-1/ trp1-1 ura3-1/ura3-1 ) at URA3 by digesting the plasmids with *Stu*I, and integrated at LEU2 by digestion with *Bst*EII. Since the Lim4 gene contains a *Stu*I site, pYFP-Lim4-CFP was digested with *Apa*I instead.

<sup>3</sup> Plasmids were integrated at the selective marker.

<sup>4</sup> Contains *Bam*HI and *Nhe*I sites between YFP and CFP genes.

<sup>5</sup> TAF18 is not tagged, but co-expressed with YFP-TAF28-CFP.
