# Supplementary material
Source: PubMed Central journal article supplement (PMC4223474)
Supplement: supp_M114.040824_mcp.M114.040824-13.pdf [file supp_M114.040824_mcp.M114.040824-13.pdf]

**Table S3. Results for the benchmark set of complexes modeled using simulated FRET<sub>R</sub> data, without linker flexibility.**

| Sub units | Noise | % Data | dRMS [Å] | dRMS <sub>T</sub> [Å] | Placement score [Å, °] |
|-----------|-------|--------|----------|-----------------------|------------------------|
| 3         | low   | 50     | 18.1     | 16.5                  | 20.1, 100              |
|           |       | 100    | 13.9     | 3.8                   | 14.5, 79               |
|           | high  | 50     | 18.3     | 16.4                  | 20.4, 102              |
|           |       | 100    | 14.7     | 5.6                   | 16.5, 86               |
| 4         | low   | 50     | 18.9     | 15.0                  | 24.6, 97               |
|           |       | 100    | 15.3     | 6.7                   | 22.5, 86               |
|           | high  | 50     | 20.5     | 19.3                  | 24.2, 103              |
|           |       | 100    | 16.4     | 9.9                   | 23.1, 92               |

Columns as in Table S2.
