# Supplementary material
Source: PubMed Central journal article supplement (PMC4223474)
Supplement: supp_M114.040824_mcp.M114.040824-14.pdf [file supp_M114.040824_mcp.M114.040824-14.pdf]

**Table S4. Table of symbols used in the equations.**

| <b>Symbol</b>           | <b>Description</b>                                                                                                                                                |
|-------------------------|-------------------------------------------------------------------------------------------------------------------------------------------------------------------|
| $X$                     | Set of $N$ modeled structures $\{X_k\}$ .                                                                                                                         |
| $X_k$                   | Individual conformation of multiple donors and acceptors in a sample.                                                                                             |
| $w_k$                   | Proportion of an individual conformation, $k$ , in the total population.                                                                                          |
| $k_{da}$                | Ratio of the excitation rates of donor to acceptor at the excitation wavelength of donor.                                                                         |
| $I_{da}$                | Ratio of CFP and YFP fluorescence intensities in the FRET channel when each is expressed at equal levels in separate cells at the excitation wavelength of donor. |
| $I_{da}^{exp}$          | Measured value of $I_{da}$ .                                                                                                                                      |
| $\sigma_{I_{da}^{exp}}$ | Standard deviation of the measured $I_{da}^{exp}$ .                                                                                                               |
| $k_{ij}^{ET}$           | Rate of energy transfer between donor $i$ and acceptor $j$ .                                                                                                      |
| $k^F$                   | Rates of fluorescence. Subscripts “d” or “a” refer to donor or acceptor.                                                                                          |
| $k^X$                   | Rates of excitation. Subscripts “d” or “a” refer to donor or acceptor.                                                                                            |
| $F_i$                   | Term that quantifies the energy transferred from donor $i$ to all the acceptors.                                                                                  |
| $R_0$                   | Forster radius.                                                                                                                                                   |
| $R_{ij}$                | Distance between donor $i$ and acceptor $j$ .                                                                                                                     |
| $g(X)$                  | A function describing the impact of energy transfer on donor fluorescence.                                                                                        |
| $[D]$                   | Concentration of donor.                                                                                                                                           |
| $[A]$                   | Concentration of acceptor.                                                                                                                                        |
| $k_d^{XF}$              | Ratio of the rate of donor excitation to the rate of donor fluorescence at the excitation wavelength of donor.                                                    |
| $Q$                     | Quantum yield. Subscripts “d” or “a” refer to donor or acceptor.                                                                                                  |
| $I^F$                   | Fluorescence intensity. Subscripts “d” or “a” refer to donor or acceptor.                                                                                         |
| $d_n$                   | Data point $n$ .                                                                                                                                                  |
| $\sigma_n$              | Uncertainty for data point $n$ .                                                                                                                                  |
| $\sigma_0$              | Typical uncertainty of dataset $\{d_n\}$ .                                                                                                                        |
| $S$                     | Spillover factor. Subscripts “d” or “a” refer to donor or acceptor.                                                                                               |
