# Supplementary material
Source: PubMed Central journal article supplement (PMC4223474)
Supplement: supp_M114.040824_mcp.M114.040824-15.pdf [file supp_M114.040824_mcp.M114.040824-15.pdf]

**Table S5. Table of the main equations.**

| Key Equations                                                                                                                                                                                                     | Description                                                                                                                                   |
|-------------------------------------------------------------------------------------------------------------------------------------------------------------------------------------------------------------------|-----------------------------------------------------------------------------------------------------------------------------------------------|
| $\text{FRET}_R = \frac{I_{\text{FRET}}}{S_{\text{tot}}}$                                                                                                                                                          | Experimental definition of $\text{FRET}_R$ .                                                                                                  |
| $p(M D, I) \propto p(D M, I) \cdot p(M I)$                                                                                                                                                                        | Posterior probability from Bayes theorem.                                                                                                     |
| $f(X, I_{da}, k_{da}) = 1 + \frac{k_{da} \cdot \{[D] - g(X)\}}{I_{da} \cdot g(X) + [A]}$                                                                                                                          | Microscopic model of $\text{FRET}_R$ . Referred to as the $\text{FRET}_R$ forward model.                                                      |
| $f(\{X_k, w_k\}, I_{da}, k_{da}) = 1 + \frac{k_{da} \cdot \{[D] - \langle g(X) \rangle\}}{I_{da} \cdot \langle g(X) \rangle + [A]}$                                                                               | Solution of $\text{FRET}_R$ generalized to take into account multiple states. Referred to as the (multi-state) $\text{FRET}_R$ forward model. |
| $p(d_n   \{X_k, w_k\}, I_{da}, k_{da}, \sigma_n) = \frac{1}{d_n \sigma_n \sqrt{2\pi}} \cdot \exp \left[ -\frac{\log^2(d_n / f(\{X_k, w_k\}, I_{da}, k_{da}))}{2\sigma_n^2} \right]$                               | Data likelihood for data point $n$ .                                                                                                          |
| $p(\sigma_n   \sigma_0) = \frac{2\sigma_0}{\sqrt{\pi}\sigma_n^2} \exp \left( -\frac{\sigma_0^2}{\sigma_n^2} \right)$                                                                                              | Prior distribution for the uncertainty $\sigma_n$ associated to data point $n$ .                                                              |
| $p(d_n   \{X_k, w_k\}, I_{da}, k_{da}, \sigma_0) = \frac{\sqrt{2}\sigma_0}{\pi d_n} \cdot \frac{1}{\log(d_n / f(\{X_k, w_k\}, I_{da}, k_{da}))^2 + 2\sigma_0^2}$                                                  | Marginal data likelihood for data point $n$ .                                                                                                 |
| $p(\{X_k, w_k\}, I_{da}, k_{da}, \sigma_0   \{d_n\}) \propto p(I_{da}   I_{da}^{exp}, \sigma_{da}^{exp}) p(k_{da}) \prod_{k=1}^N p(X_k) p(w_k) \prod_{n=1}^{N_F} p(d_n   \{X_k, w_k\}, I_{da}, k_{da}, \sigma_0)$ | Multi-state posterior probability.                                                                                                            |
