# Supplementary material
Source: PubMed Central journal article supplement (PMC4223474)

## A Benchmark flowchart

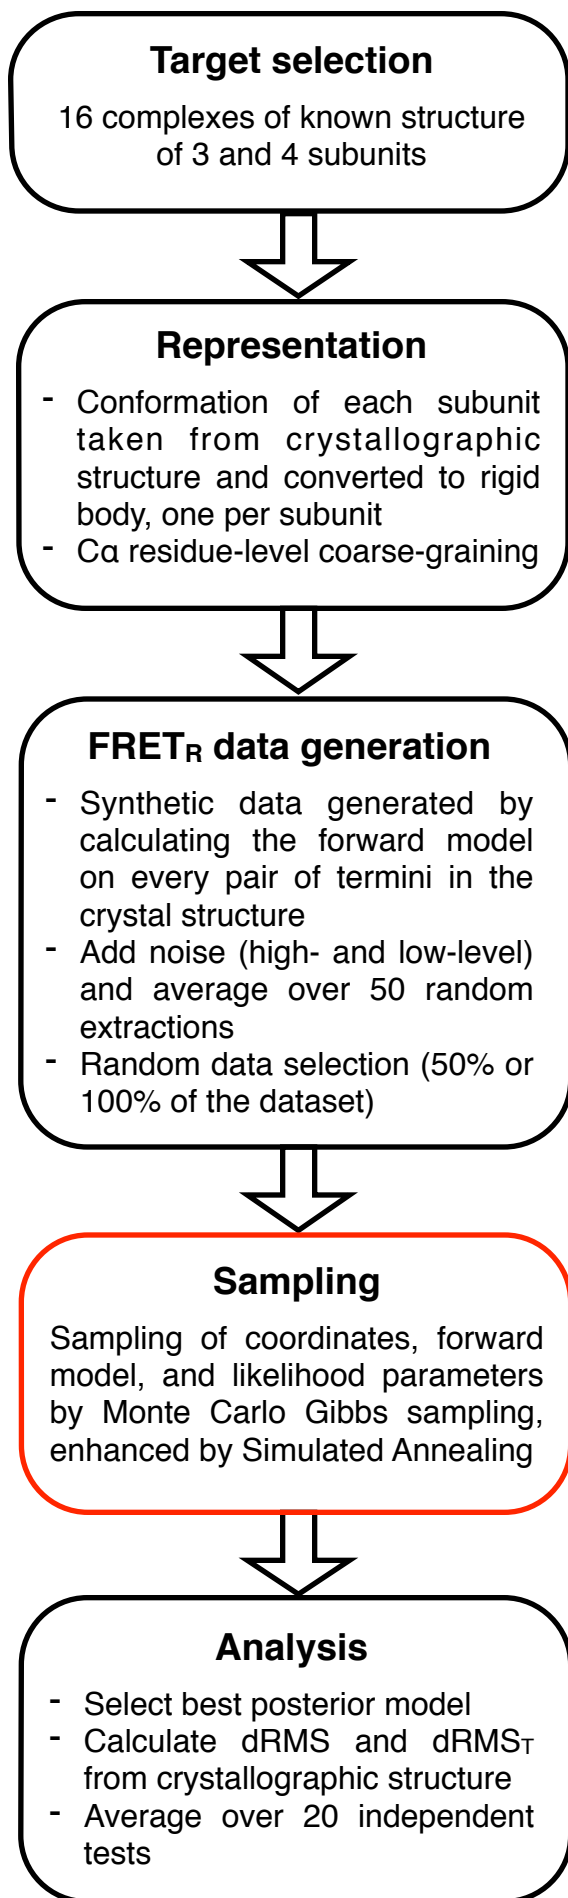

## B Sampling flowchart

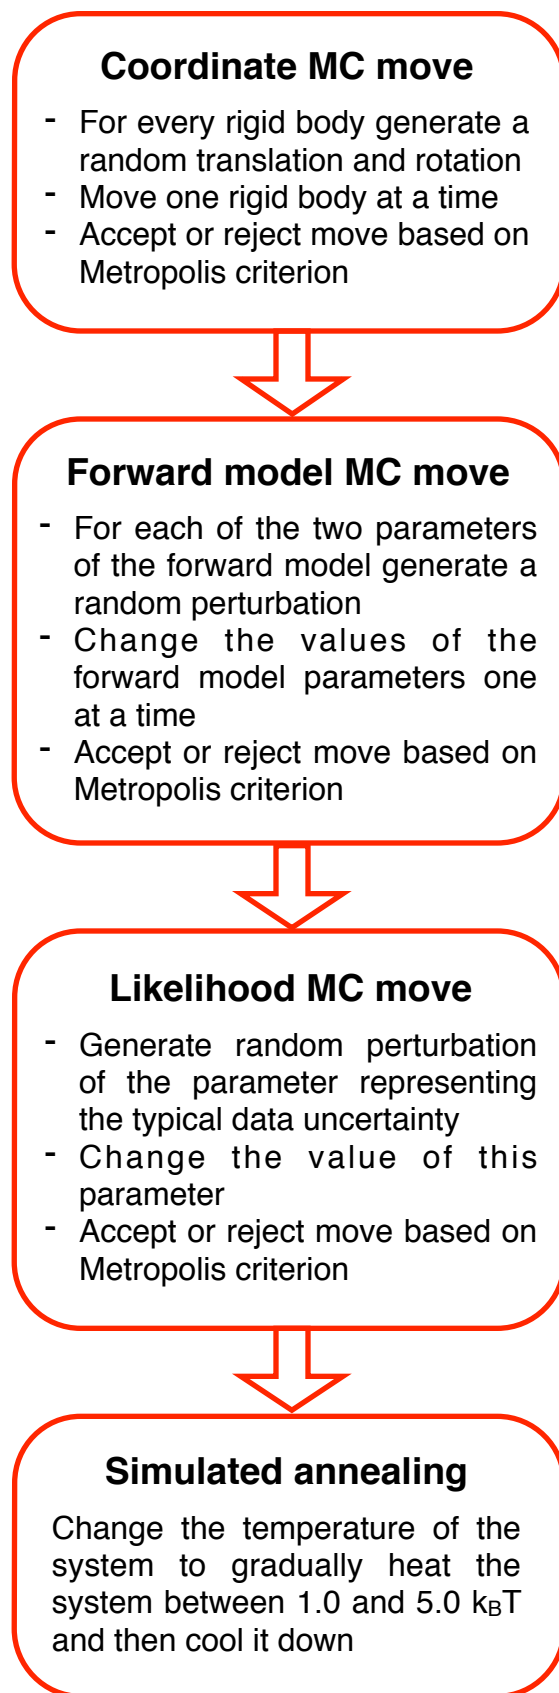

Supplement: supp_M114.040824_mcp.M114.040824-10.pdf [file supp_M114.040824_mcp.M114.040824-10.pdf]

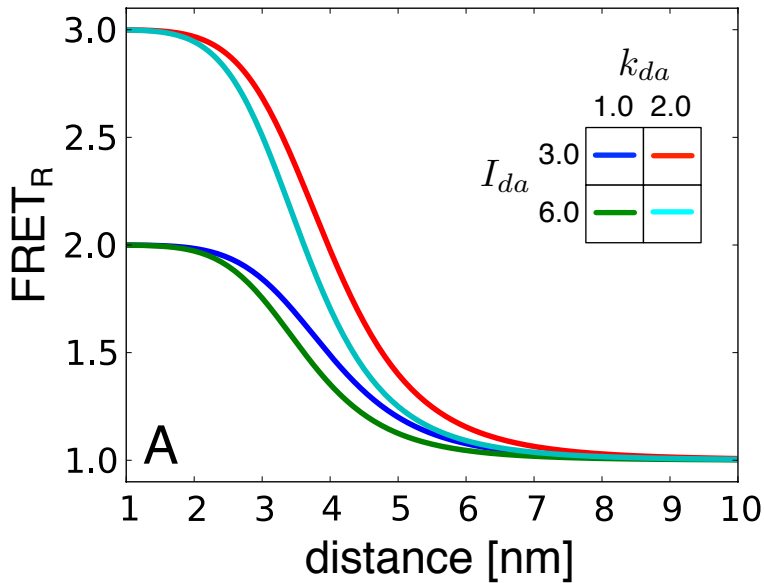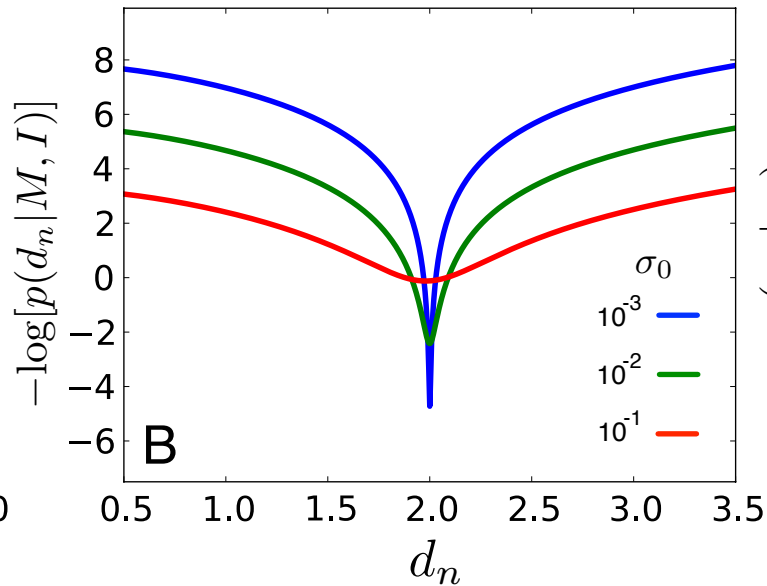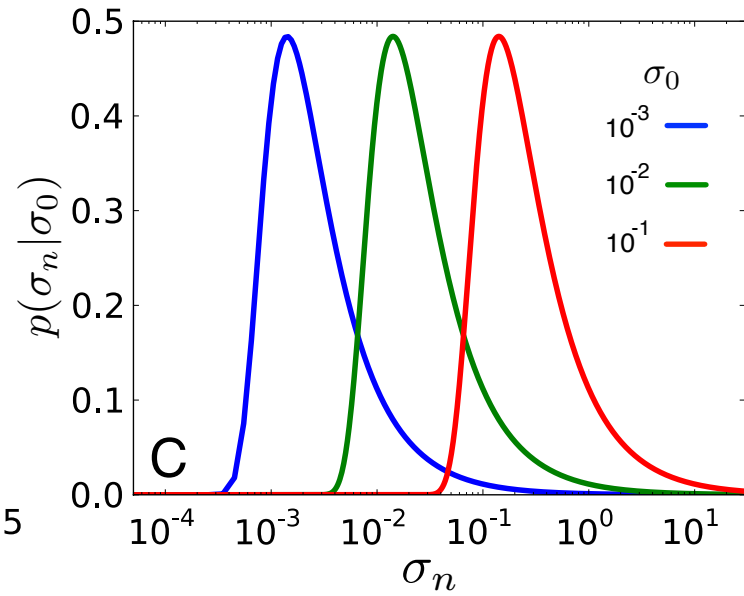

Supplement: supp_M114.040824_mcp.M114.040824-2.pdf [file supp_M114.040824_mcp.M114.040824-2.pdf]

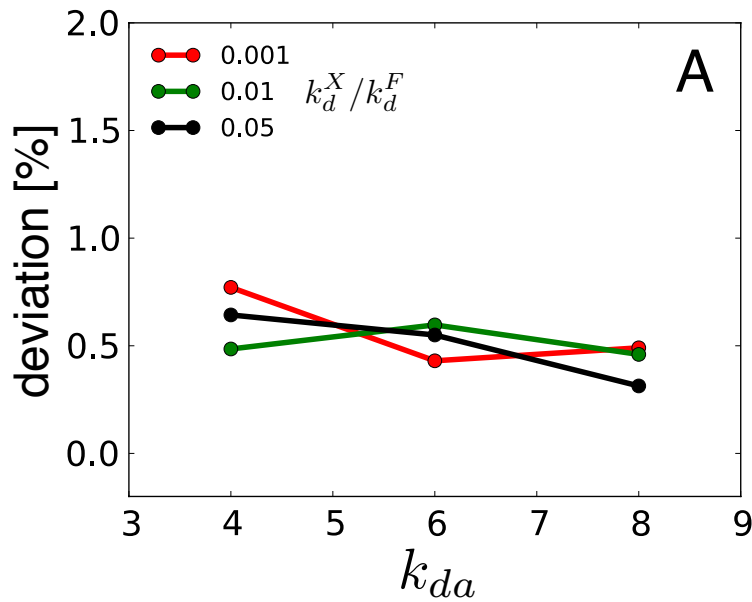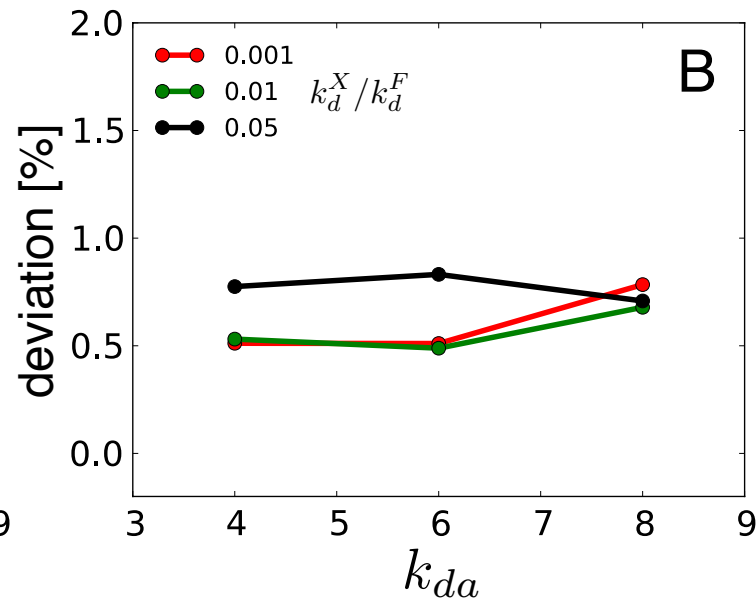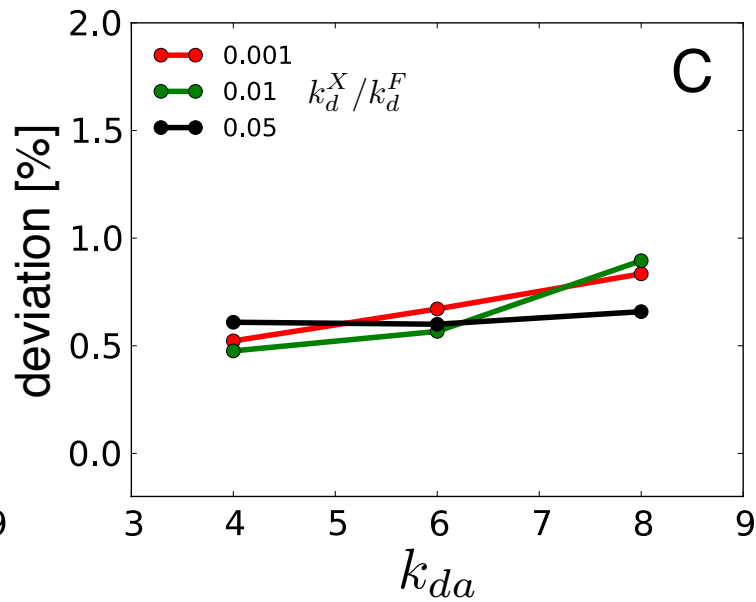

Supplement: supp_M114.040824_mcp.M114.040824-3.pdf [file supp_M114.040824_mcp.M114.040824-3.pdf]

**A**

2 CFP : 1 YFP

FRET<sub>R</sub>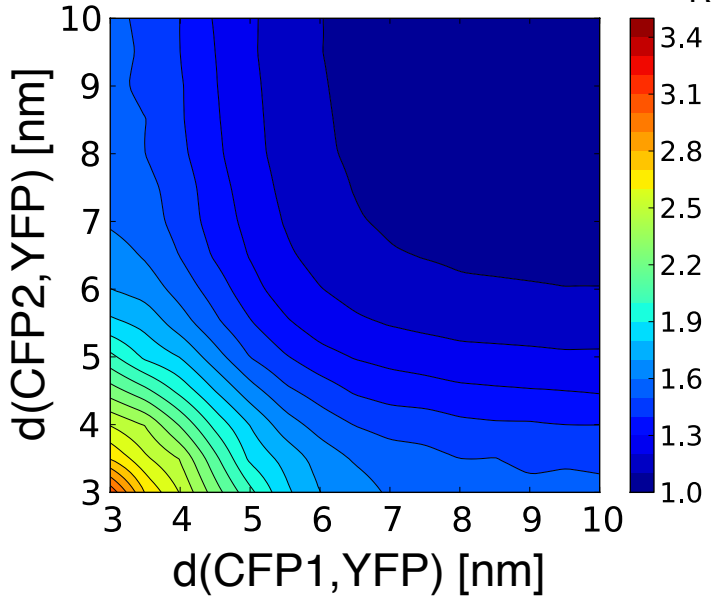**B**

1 CFP : 2 YFP

FRET<sub>R</sub>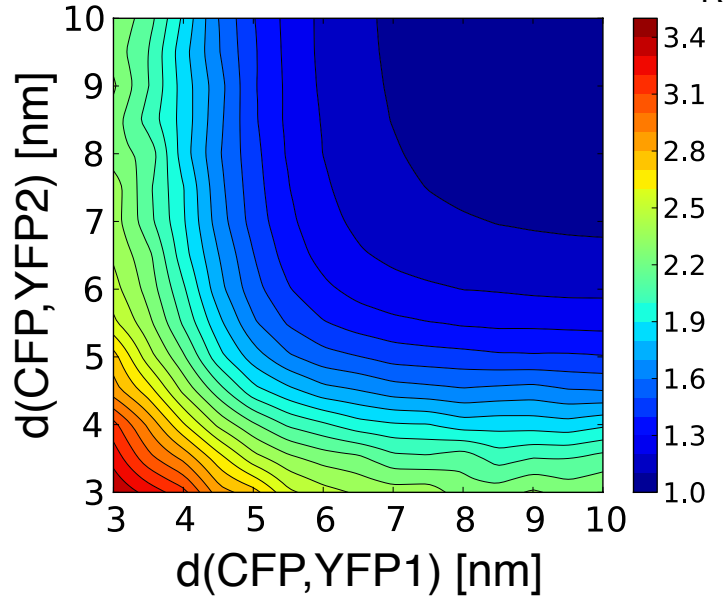**C**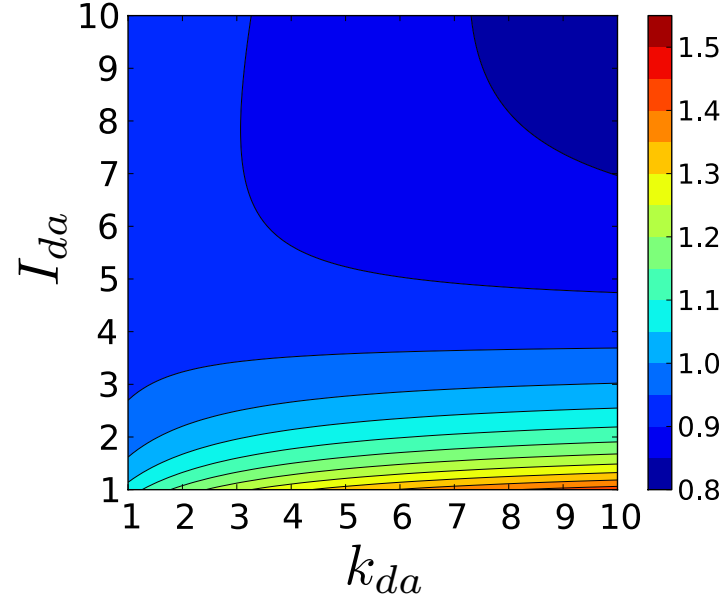

Supplement: supp_M114.040824_mcp.M114.040824-4.pdf [file supp_M114.040824_mcp.M114.040824-4.pdf]

**A**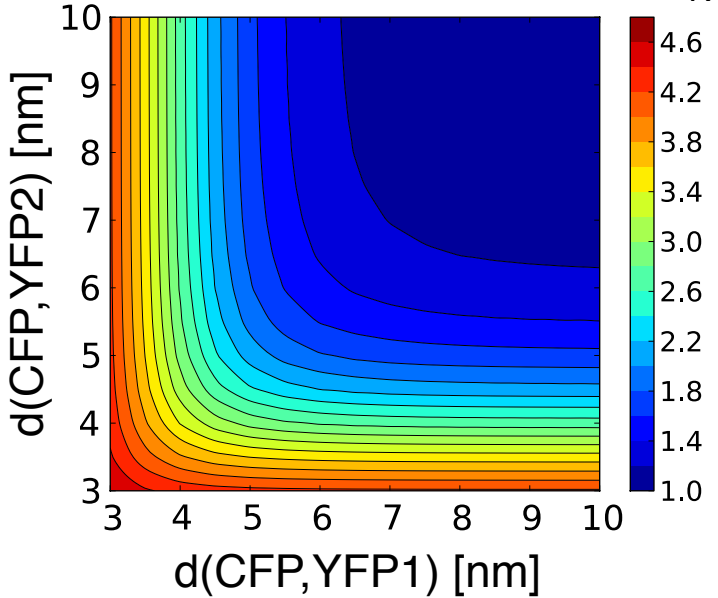**B**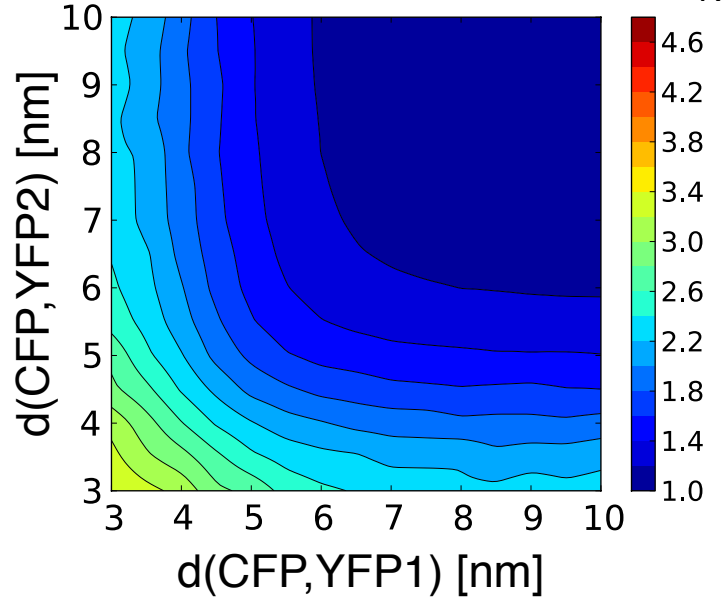**C**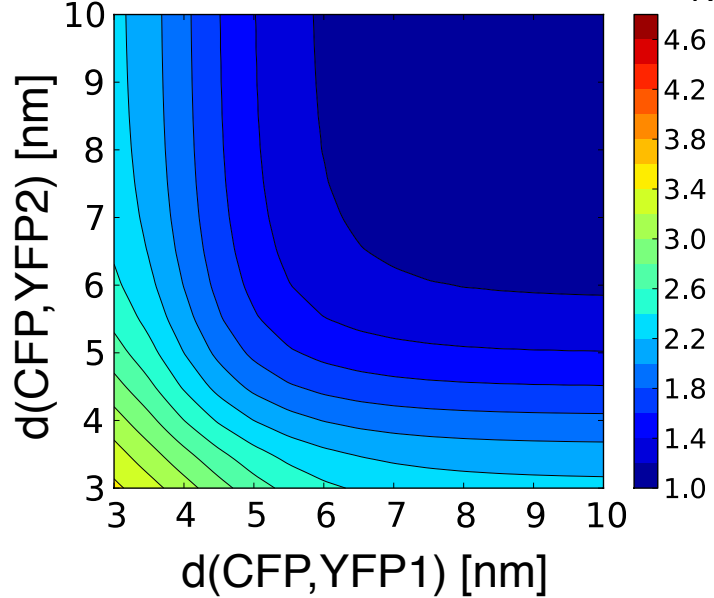

Supplement: supp_M114.040824_mcp.M114.040824-5.pdf [file supp_M114.040824_mcp.M114.040824-5.pdf]

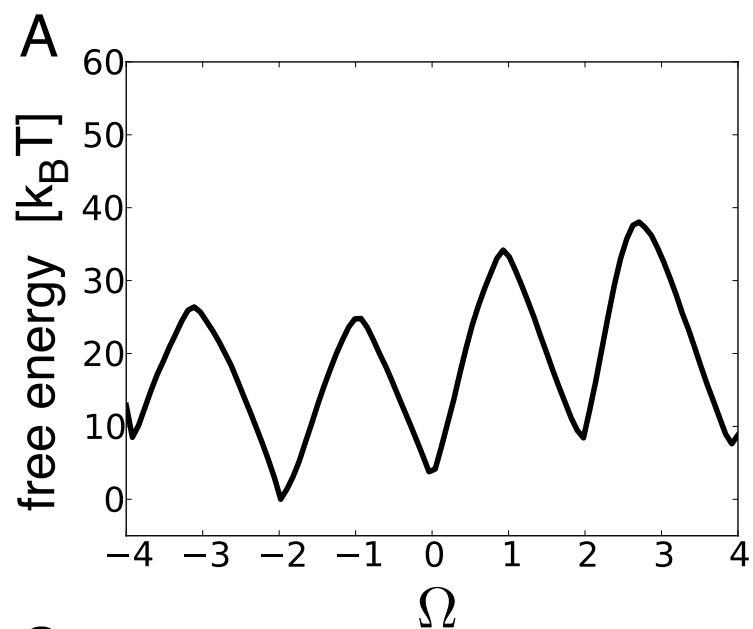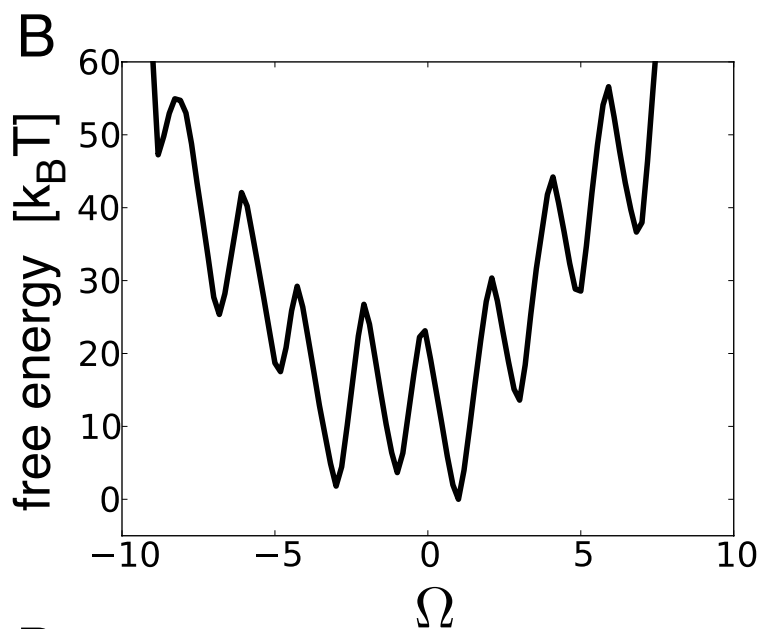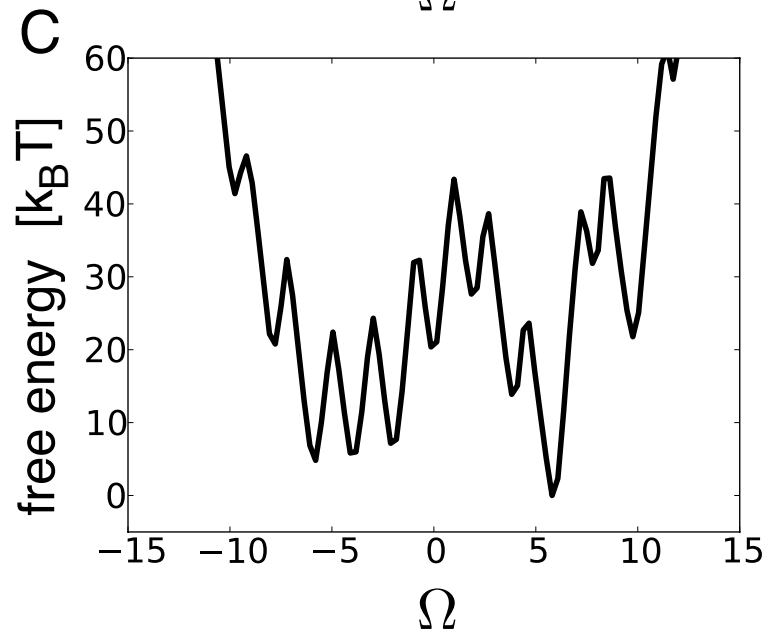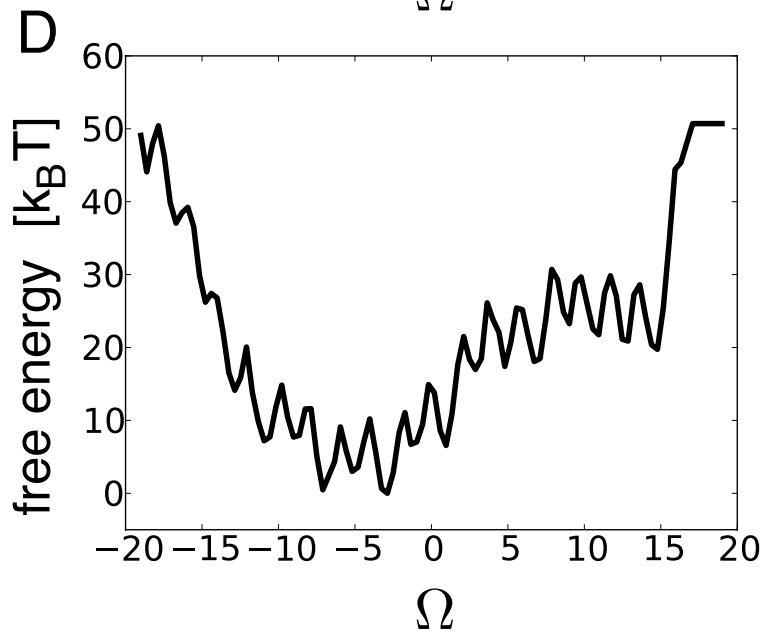

Supplement: supp_M114.040824_mcp.M114.040824-6.pdf [file supp_M114.040824_mcp.M114.040824-6.pdf]

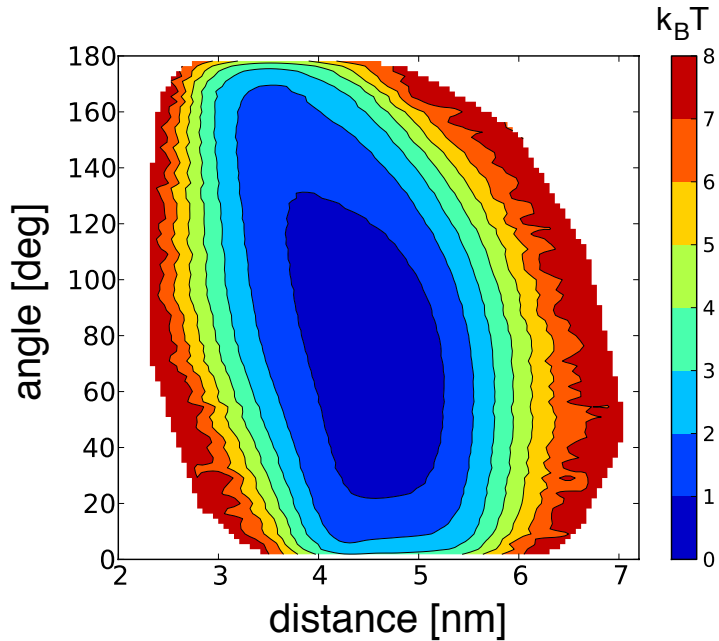

Supplement: supp_M114.040824_mcp.M114.040824-7.pdf [file supp_M114.040824_mcp.M114.040824-7.pdf]

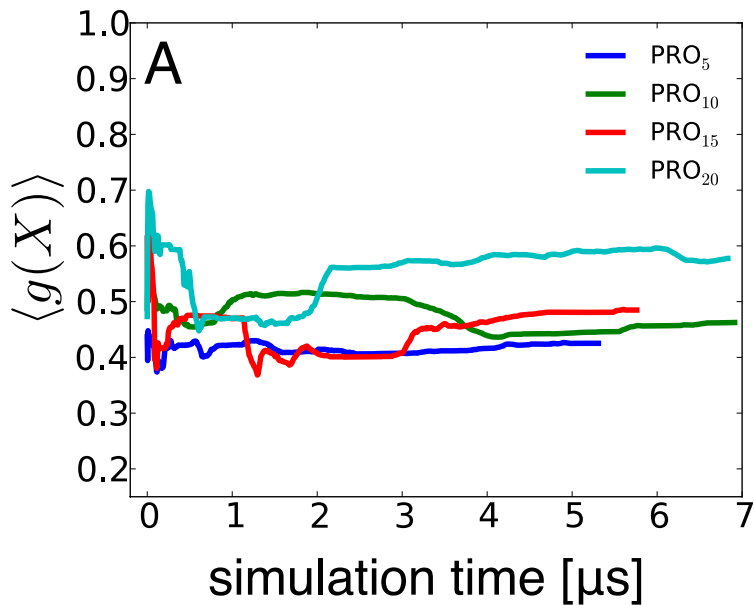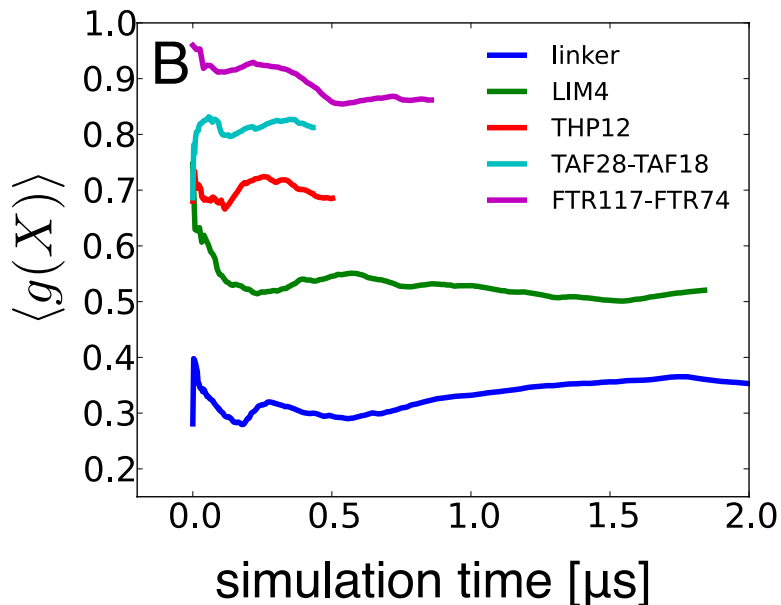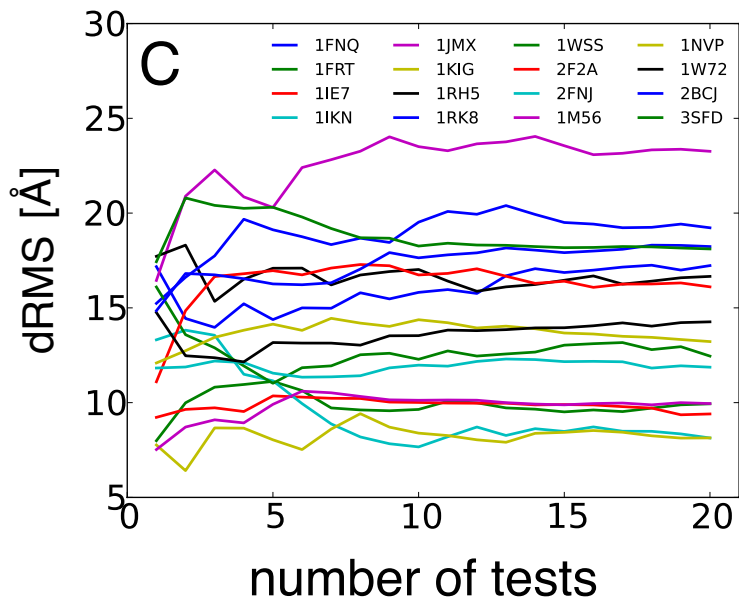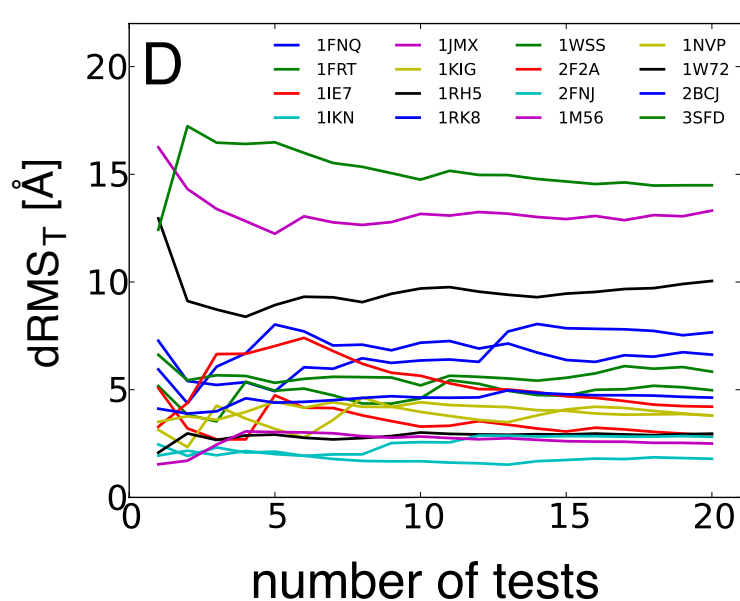

Supplement: supp_M114.040824_mcp.M114.040824-8.pdf [file supp_M114.040824_mcp.M114.040824-8.pdf]

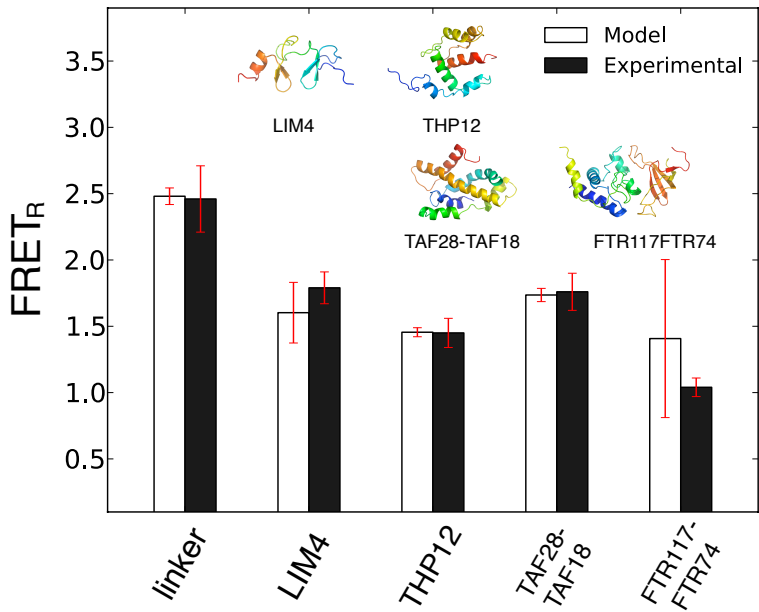

Supplement: supp_M114.040824_mcp.M114.040824-9.pdf [file supp_M114.040824_mcp.M114.040824-9.pdf]
